# Supplementary material for: Self-Recalibrating Surface EMG Pattern Recognition for Neuroprosthesis Control Based on Convolutional Neural Network
Source: PubMed Central journal article supplement (PMC5504564; doi:10.3389/fnins.2017.00379), 2017-07-11
Supplement: DataSheet1.pdf [file DataSheet1.pdf]

## Supplementary Material

# Self-Recalibrating Surface EMG Pattern Recognition for Neuroprosthesis Control based on Convolutional Neural Network

Xiaolong Zhai, Beth Jelfs, Rosa H. M. Chan, Chung Tin\*

\* Correspondence: Chung Tin, PhD.: chungtin@cityu.edu.hk

### 1 Supplementary Figures

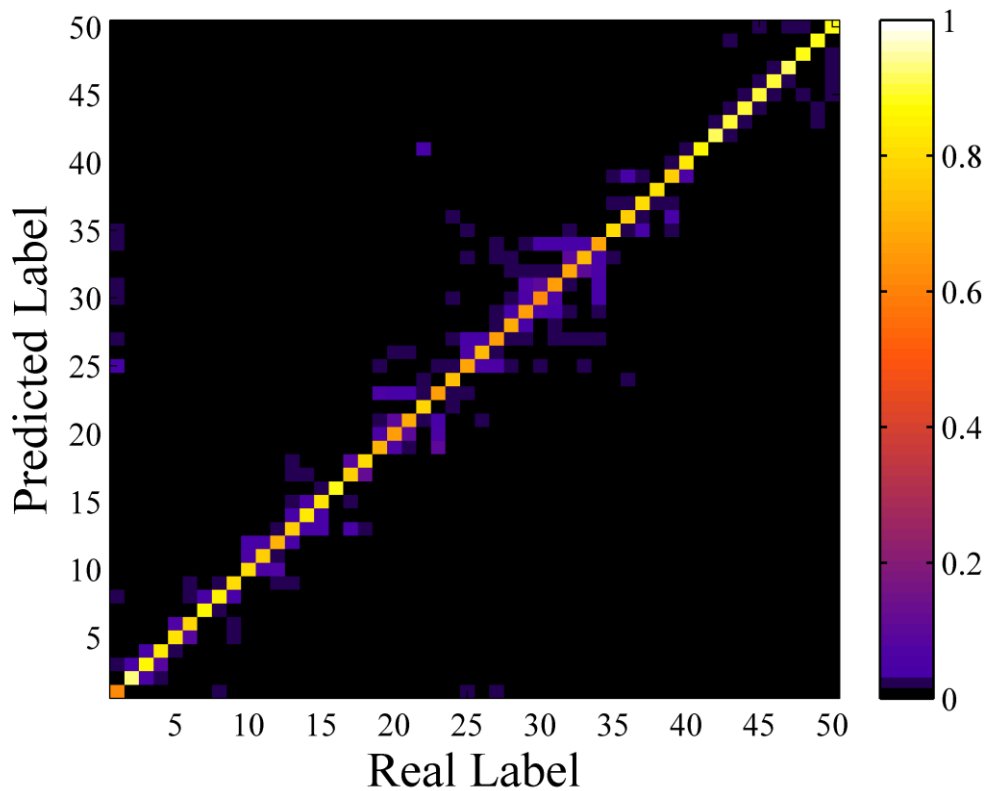

**Supplementary Figure S1.** Confusion matrix of prediction using CNN for all 50 movements. Most of the confusion occurs with movements that have indices close to the index of the actual movement. In other words, the confusion mainly occurs in the same class of movement.

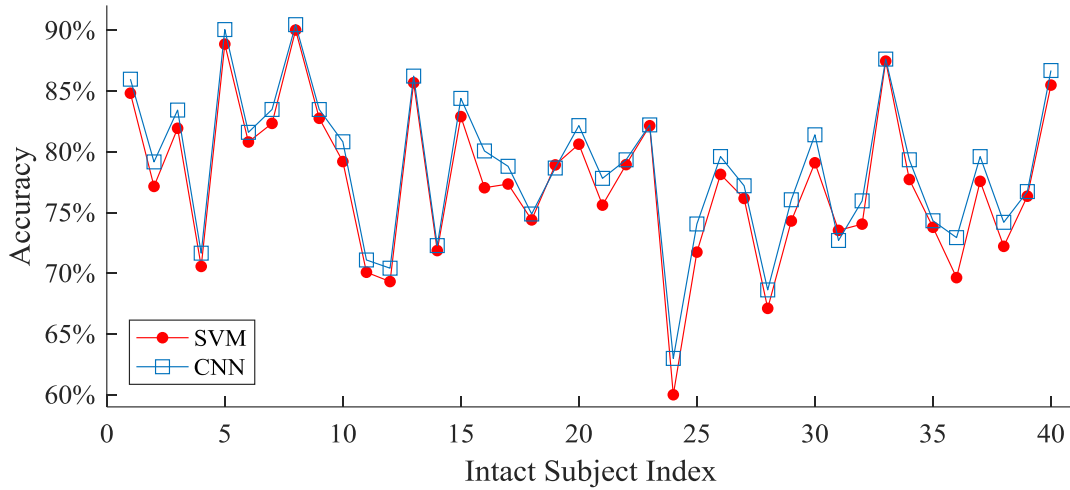

**Supplementary Figure S2.** Comparison of CNN and SVM subject-to-subject accuracy of baseline classifier in intact subject with all movement types.

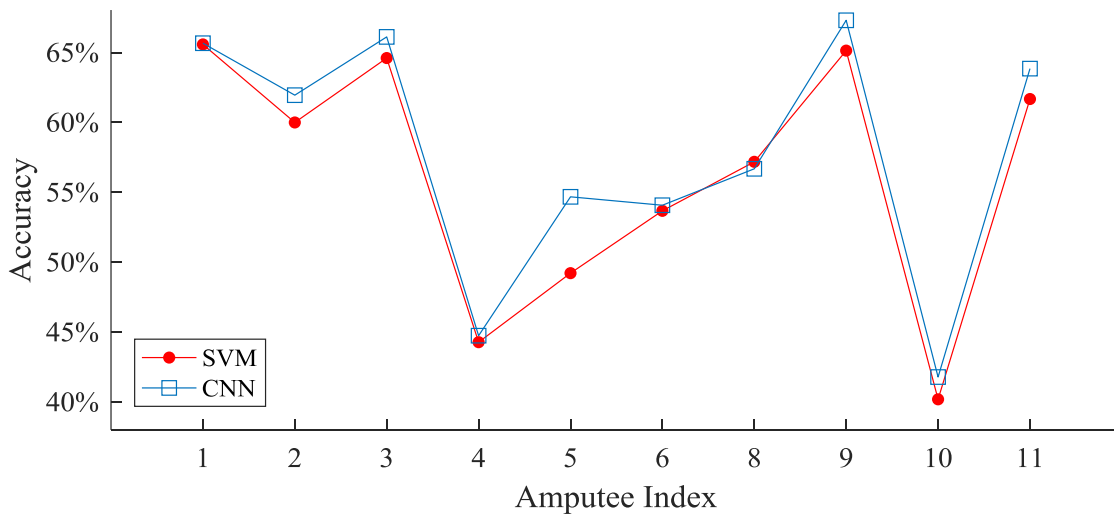

**Supplementary Figure S3.** Comparison of CNN and SVM subject-to-subject accuracy of baseline classifier in amputee subject with all movement types.

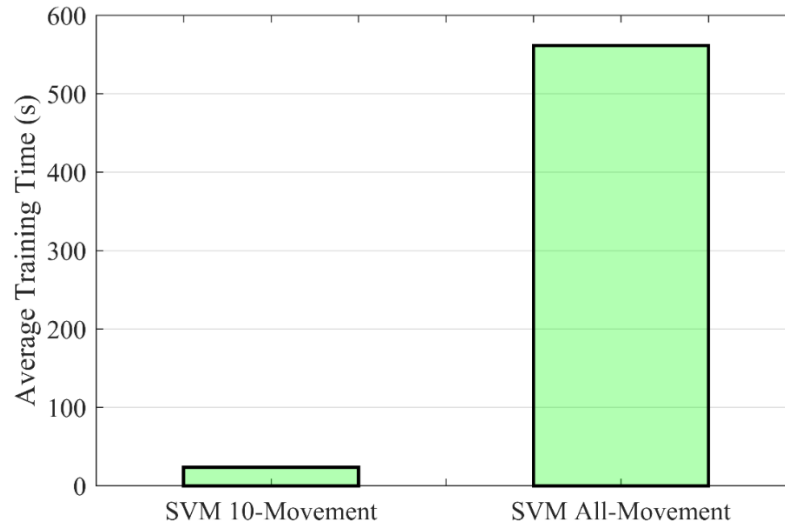

**Supplementary Figure S4.** Average training time of SVM for one subject. The training procedure was repeated 10 times to obtain an average training time. The SVM model was implemented for 4-Core parallel computing to be run on an Intel i5-6000.

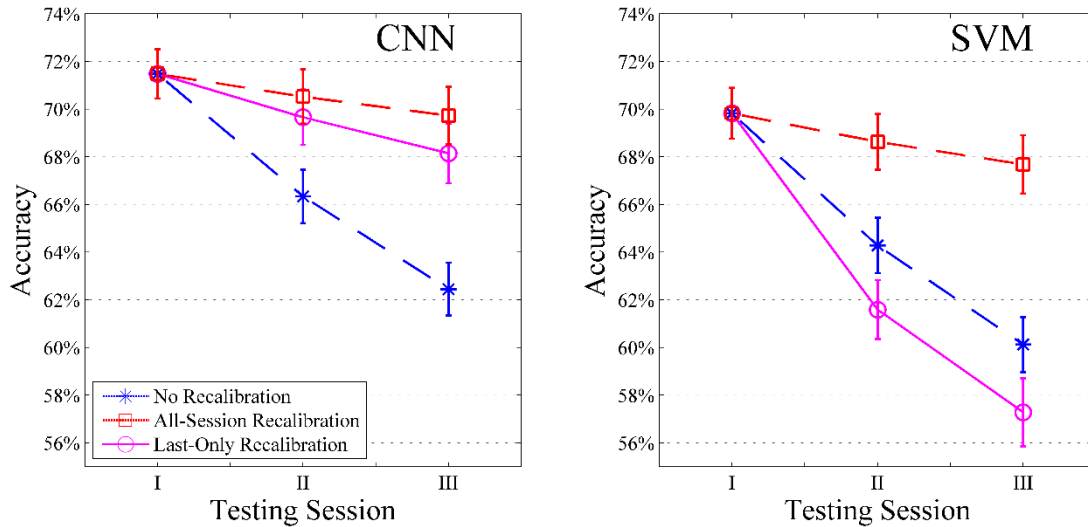

**Supplementary Figure S5.** Average session-to-session accuracy in self re-calibration scenario of intact subject using 3 repetitions for initial training (n=40) tested with all movement types. Repetitions 1, 2 and 3 of movement were used as the training data, and the other 3 repetitions were tested one by one with or without recalibration. The overall performance of CNN and SVM were increased by about 10% when compared with results in Fig. 6a which used only one repetition for initial training.

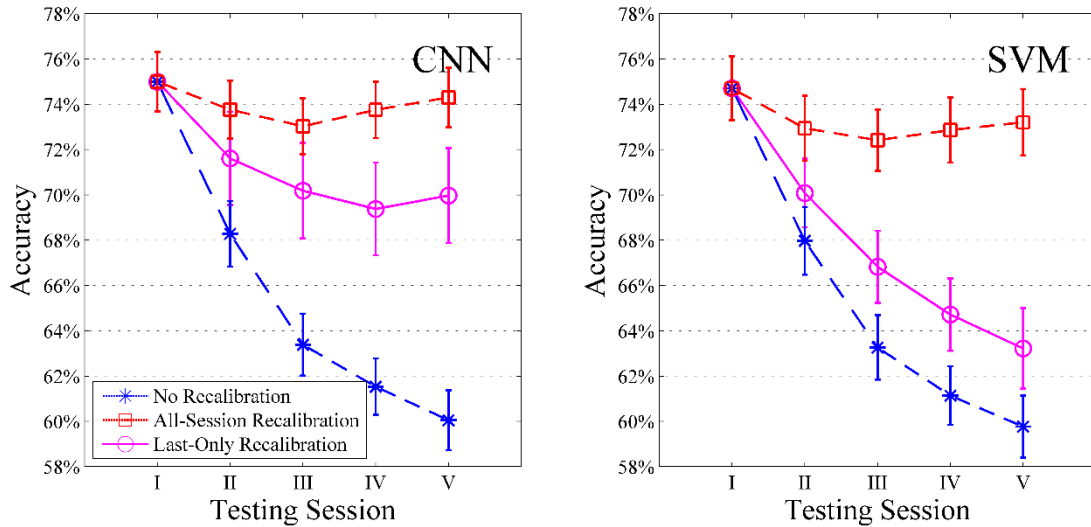

**Supplementary Figure S6.** Comparison of CNN and SVM in intact subjects ( $n=40$ ) tested with 10 movement subset. Average session-to-session accuracy in different self-recalibration scenario. Repetition 1 of movement was used as the training data, and repetitions 2 to 6 were tested one by one with or without recalibration.

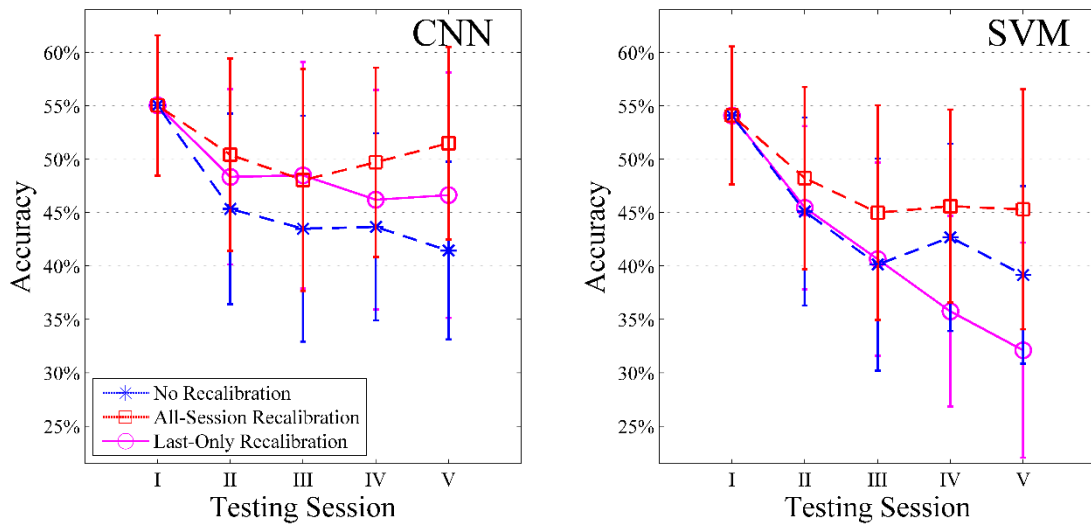

**Supplementary Figure S7.** Comparison of CNN and SVM in amputee subjects with remaining forearm  $>70\%$  ( $n=4$ ) tested with 10 movement subset. Average session-to-session accuracy in different self-recalibration scenario. Repetition 1 of movement was used as the training data, and repetitions 2 to 6 were tested one by one with or without recalibration.

**Supplementary Table S1.** Average movement-to- movement accuracy for baseline classifier and self-recalibration scenarios.

| Index | Pattern Name                                                         | Baseline | Average accuracy over 5 testing sessions |             |           |
|-------|----------------------------------------------------------------------|----------|------------------------------------------|-------------|-----------|
|       |                                                                      |          | No Recalibration                         | All Session | Last Only |
| 1     | Rest                                                                 | 61.61%   | 31.23%                                   | 35.34%      | 30.88%    |
| 2     | Thumb up                                                             | 93.28%   | 63.39%                                   | 72.72%      | 71.60%    |
| 3     | Extension of index and middle, flexion of the others                 | 86.76%   | 56.44%                                   | 69.63%      | 70.30%    |
| 4     | Flexion of ring and little finger, extension of the others           | 83.13%   | 65.12%                                   | 70.40%      | 68.78%    |
| 5     | Thumb opposing base of little finger                                 | 82.35%   | 48.71%                                   | 59.02%      | 59.43%    |
| 6     | Abduction of all fingers                                             | 78.98%   | 54.85%                                   | 65.59%      | 65.56%    |
| 7     | Fingers flexed together in fist                                      | 87.48%   | 66.09%                                   | 75.27%      | 74.41%    |
| 8     | Pointing index                                                       | 85.05%   | 63.03%                                   | 70.92%      | 67.69%    |
| 9     | Adduction of extended fingers                                        | 80.43%   | 53.20%                                   | 59.76%      | 55.16%    |
| 10    | Wrist supination (axis: middle finger)                               | 81.15%   | 46.56%                                   | 58.47%      | 59.80%    |
| 11    | Wrist pronation (axis: middle finger)                                | 77.79%   | 51.48%                                   | 63.65%      | 63.23%    |
| 12    | Wrist supination (axis: little finger)                               | 71.58%   | 37.70%                                   | 47.86%      | 45.54%    |
| 13    | Wrist pronation (axis: little finger)                                | 77.35%   | 39.62%                                   | 52.40%      | 51.41%    |
| 14    | Wrist flexion                                                        | 82.98%   | 62.12%                                   | 72.23%      | 69.60%    |
| 15    | Wrist extension                                                      | 81.86%   | 61.55%                                   | 69.36%      | 67.44%    |
| 16    | Wrist radial deviation                                               | 88.97%   | 57.69%                                   | 70.29%      | 67.24%    |
| 17    | Wrist ulnar deviation                                                | 77.97%   | 48.26%                                   | 58.18%      | 59.44%    |
| 18    | Wrist extension with closed hand                                     | 80.69%   | 66.64%                                   | 75.58%      | 71.52%    |
| 19    | Large diameter grasp                                                 | 70.52%   | 35.22%                                   | 44.02%      | 46.02%    |
| 20    | Small diameter grasp (power grip)                                    | 66.63%   | 37.34%                                   | 47.59%      | 48.72%    |
| 21    | Fixed hook grasp                                                     | 69.09%   | 32.07%                                   | 39.71%      | 39.48%    |
| 22    | Index finger extension grasp                                         | 79.41%   | 47.37%                                   | 61.47%      | 56.69%    |
| 23    | Medium wrap                                                          | 66.23%   | 39.55%                                   | 48.21%      | 41.52%    |
| 24    | Ring grasp                                                           | 74.19%   | 48.03%                                   | 61.30%      | 57.85%    |
| 25    | Prismatic four fingers grasp                                         | 67.34%   | 30.33%                                   | 37.51%      | 36.52%    |
| 26    | Stick grasp                                                          | 72.98%   | 49.47%                                   | 60.81%      | 58.50%    |
| 27    | Writing tripod grasp                                                 | 66.31%   | 32.32%                                   | 40.20%      | 38.39%    |
| 28    | Power sphere grasp                                                   | 69.83%   | 40.08%                                   | 49.91%      | 47.17%    |
| 29    | Three finger sphere grasp                                            | 66.12%   | 34.00%                                   | 44.17%      | 41.98%    |
| 30    | Precision sphere grasp                                               | 60.99%   | 39.62%                                   | 48.29%      | 47.61%    |
| 31    | Tripod grasp                                                         | 66.41%   | 34.41%                                   | 40.79%      | 38.93%    |
| 32    | Prismatic pinch grasp                                                | 68.13%   | 31.73%                                   | 37.69%      | 38.27%    |
| 33    | Tip pinch grasp                                                      | 72.07%   | 49.13%                                   | 56.77%      | 54.00%    |
| 34    | Quadpod grasp                                                        | 67.78%   | 33.82%                                   | 42.25%      | 40.83%    |
| 35    | Lateral grasp                                                        | 80.20%   | 53.71%                                   | 62.45%      | 61.03%    |
| 36    | Parallel extension grasp                                             | 76.89%   | 46.66%                                   | 57.72%      | 55.61%    |
| 37    | Extension type grasp                                                 | 79.71%   | 52.55%                                   | 60.71%      | 60.10%    |
| 38    | Power disk grasp                                                     | 82.43%   | 60.39%                                   | 71.57%      | 69.57%    |
| 39    | Open a bottle with a tripod grasp                                    | 76.89%   | 44.25%                                   | 57.18%      | 56.91%    |
| 40    | Turn a screw (grasp the screwdriver with a stick grasp)              | 83.96%   | 57.74%                                   | 72.96%      | 69.87%    |
| 41    | Cut something (grasp the knife with an index finger extension grasp) | 86.23%   | 67.34%                                   | 81.08%      | 80.30%    |
| 42    | Flexion of the little finger                                         | 91.66%   | 62.74%                                   | 75.28%      | 74.20%    |
| 43    | Flexion of the ring finger                                           | 89.08%   | 68.26%                                   | 78.14%      | 78.07%    |
| 44    | Flexion of the middle finger                                         | 90.00%   | 70.26%                                   | 76.76%      | 75.51%    |
| 45    | Flexion of the index finger                                          | 89.46%   | 70.17%                                   | 79.12%      | 77.15%    |
| 46    | Abduction of the thumb                                               | 90.46%   | 76.76%                                   | 84.14%      | 83.31%    |
| 47    | Flexion of the thumb                                                 | 91.00%   | 70.27%                                   | 77.26%      | 77.30%    |
| 48    | Flexion of index and little finger                                   | 88.57%   | 65.78%                                   | 75.62%      | 73.20%    |
| 49    | Flexion of ring and middle finger                                    | 87.98%   | 78.61%                                   | 85.01%      | 84.23%    |
| 50    | Flexion of index finger and thumb                                    | 87.63%   | 65.94%                                   | 72.41%      | 69.23%    |
